# Supplementary material
Source: publisher figshare collection journal article supplement (https://aacr.figshare.com/articles/dataset/_/22545329)
Supplement: Supplementary file 1 [file 40008758]

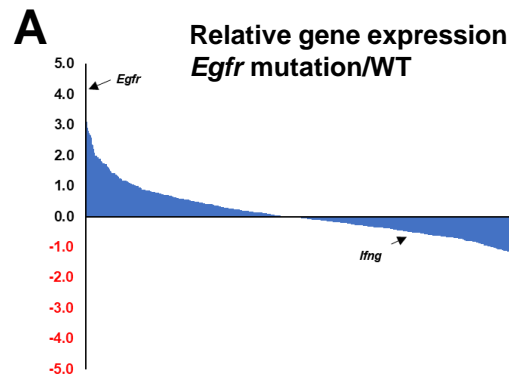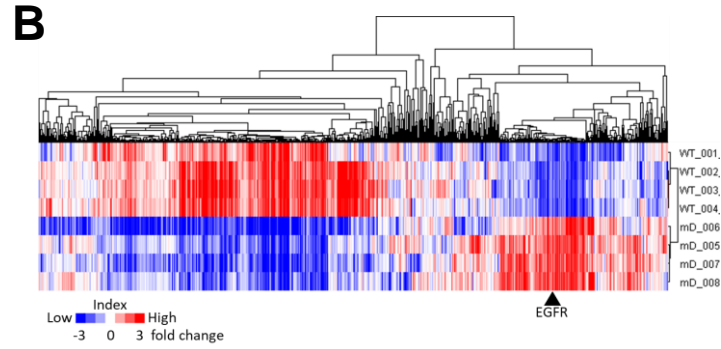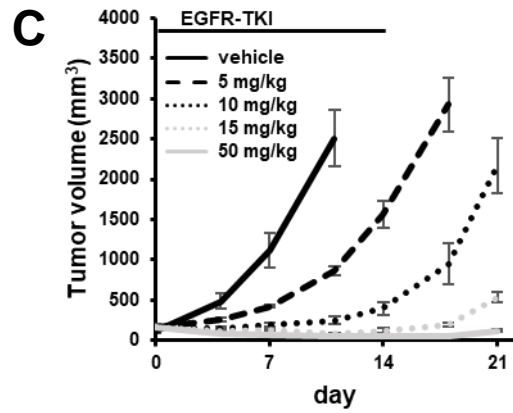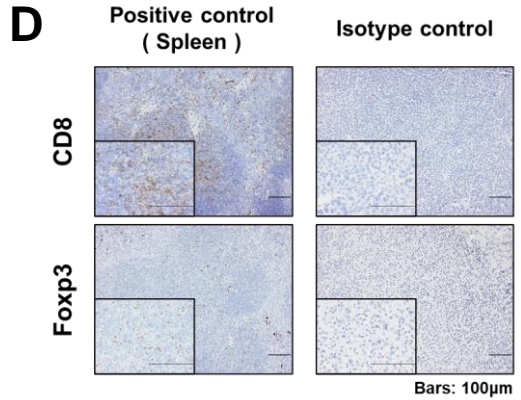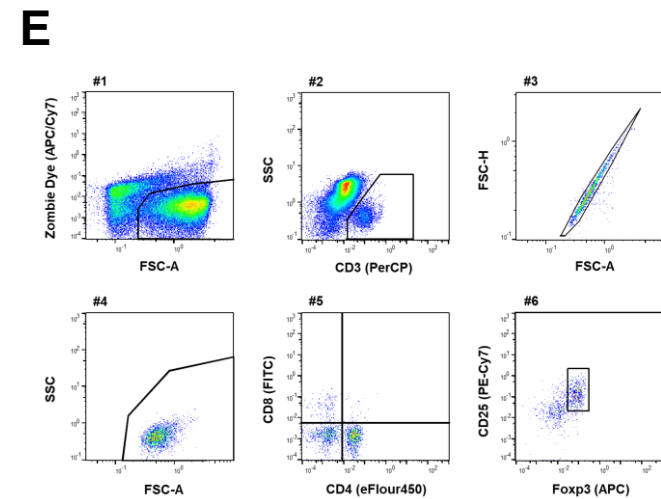

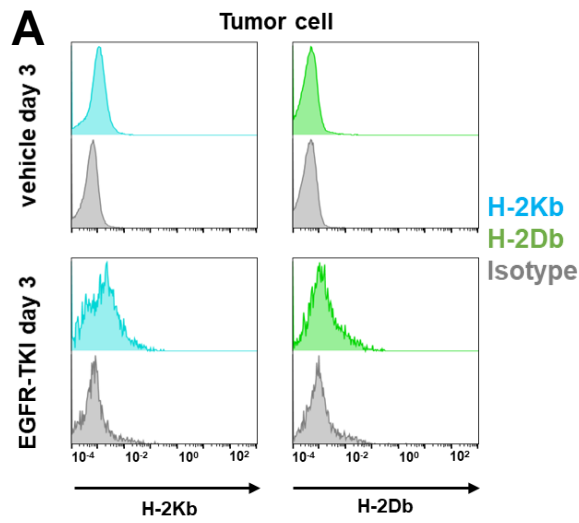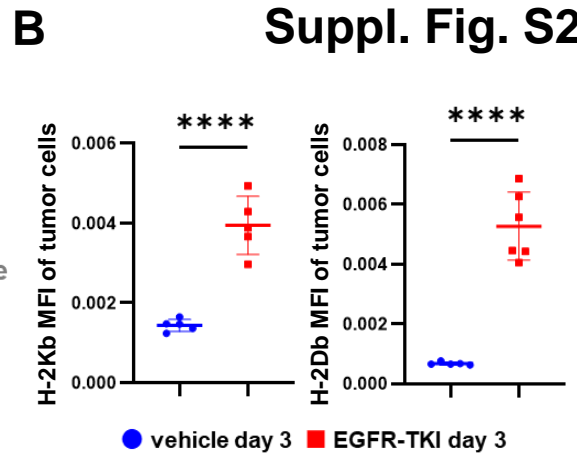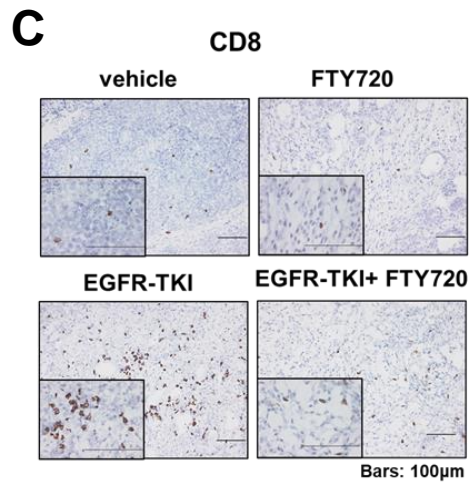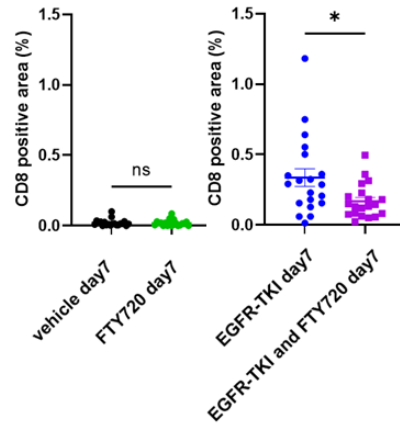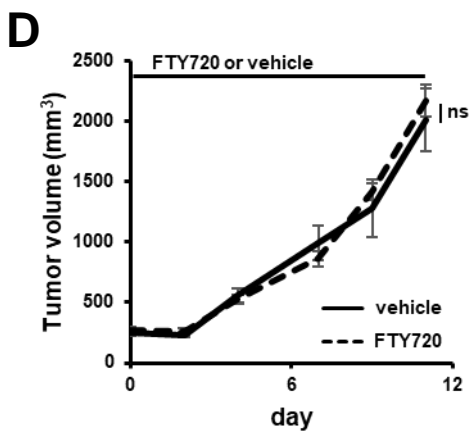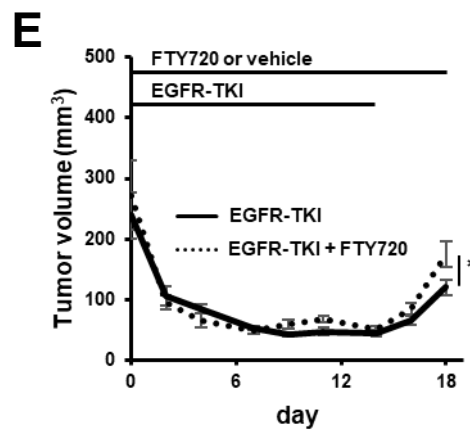

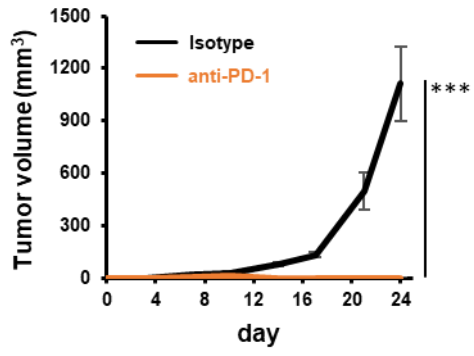

**A**

vehicle day 4

EGFR-TKI day 4

EGFR-TKI day 14

VEGFR2

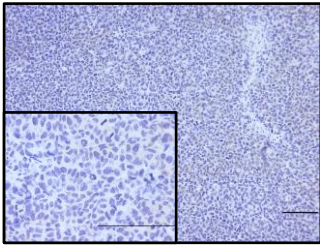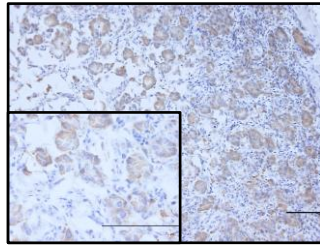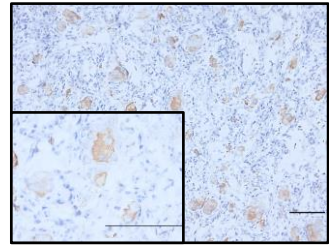

FasL

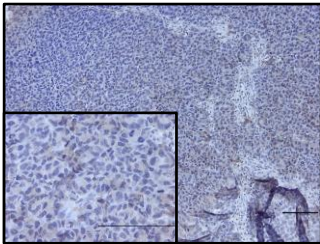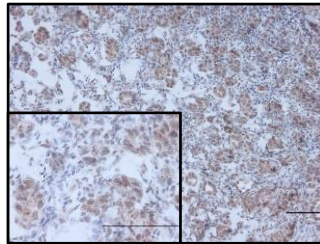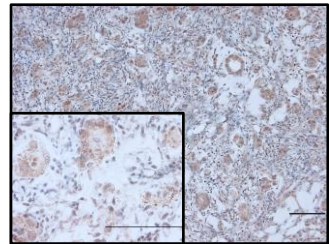**B**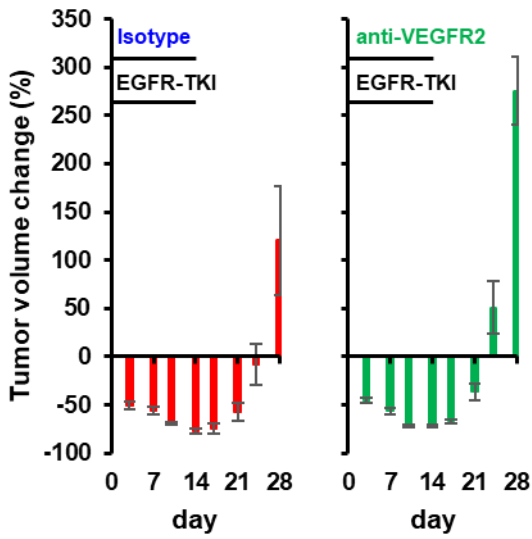

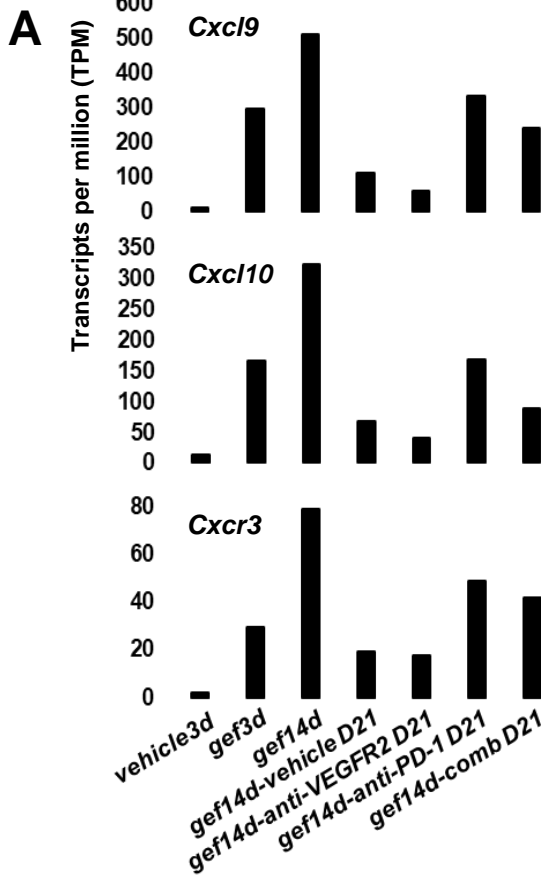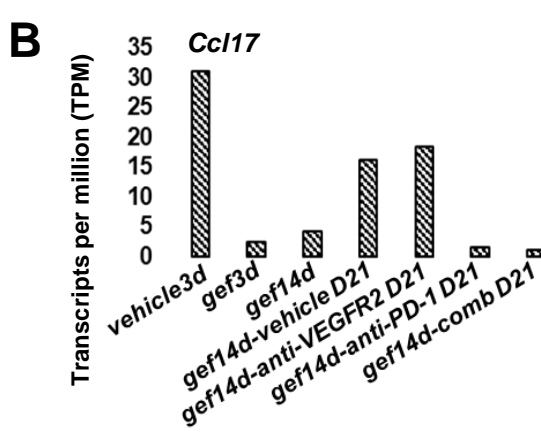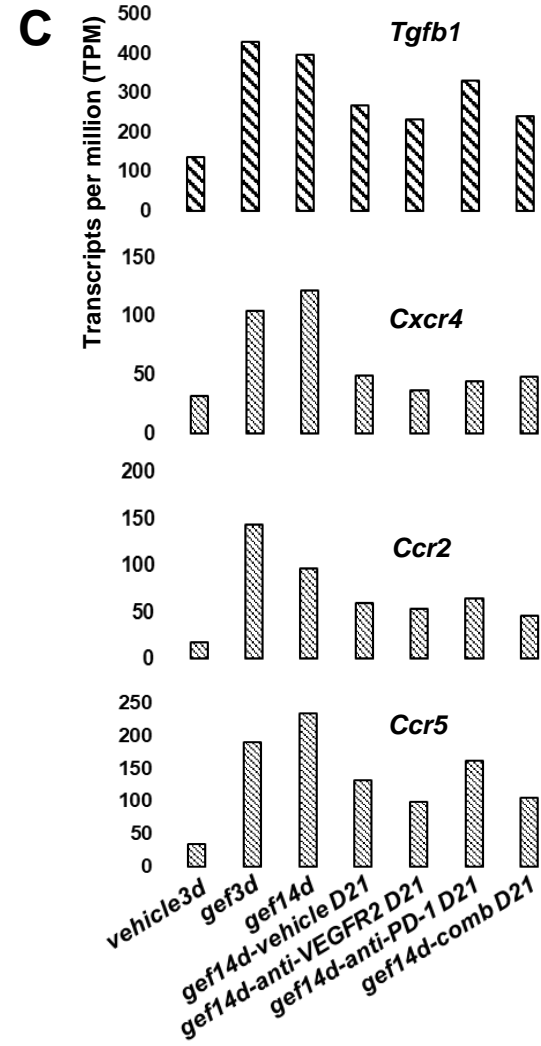

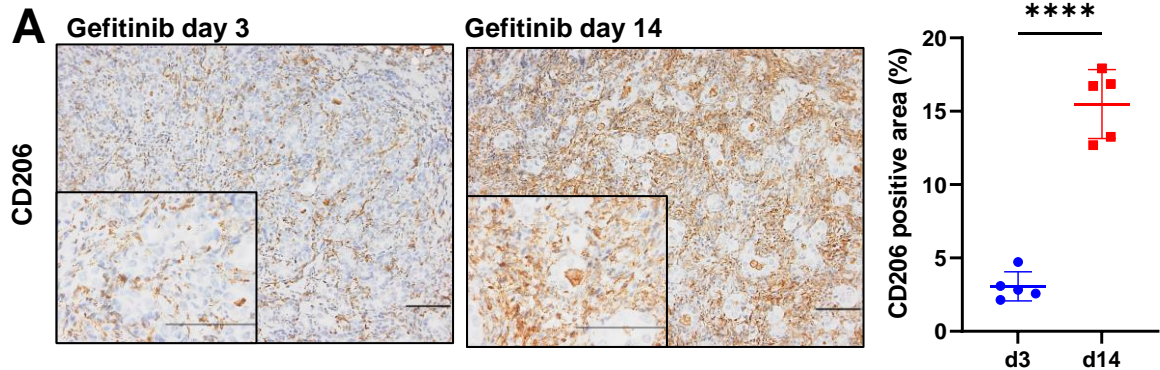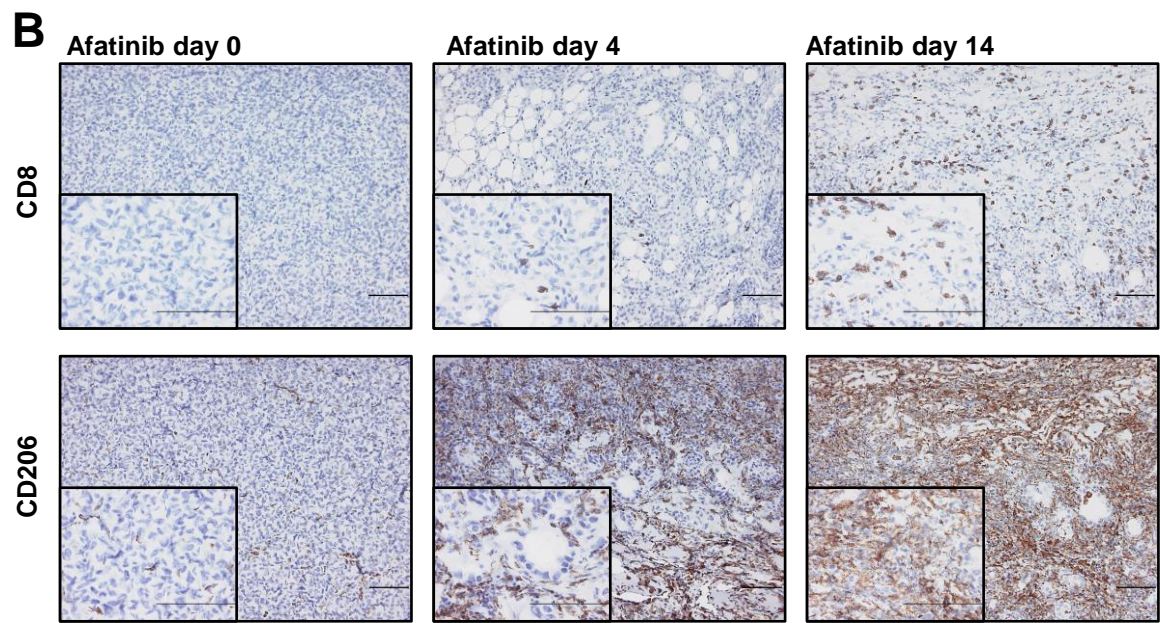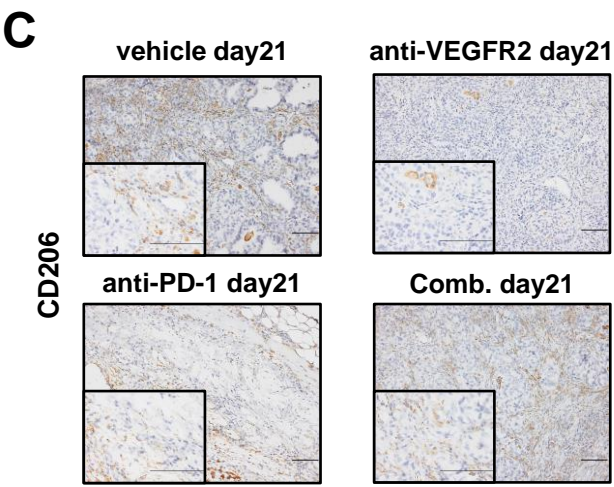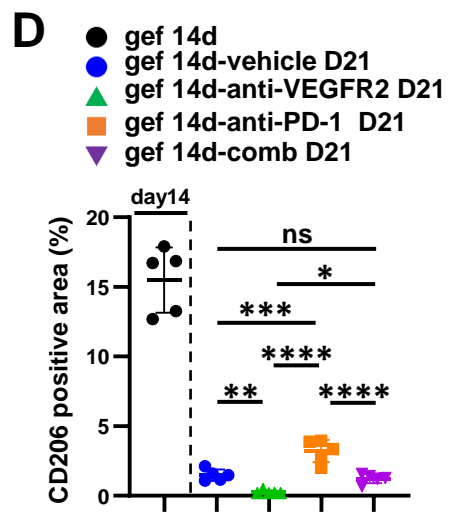

Suppl. Fig. S6

**A**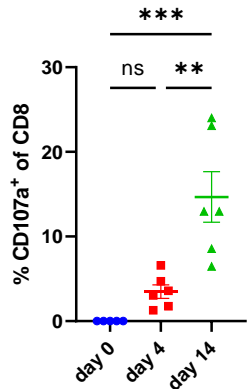**B**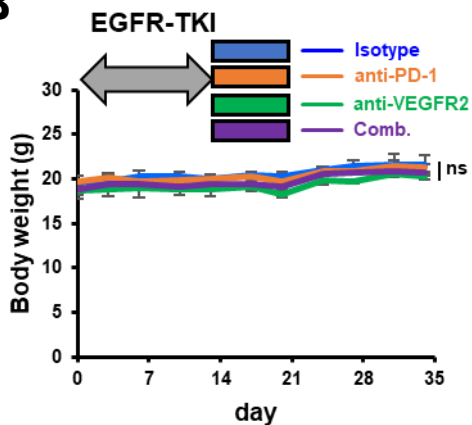**C**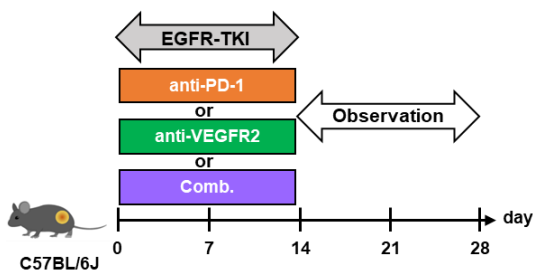**D**

Exp #1

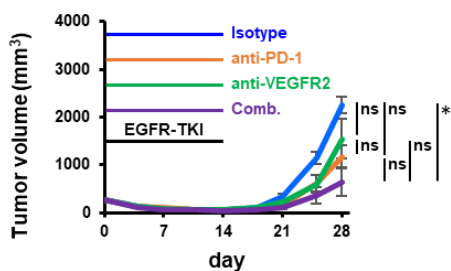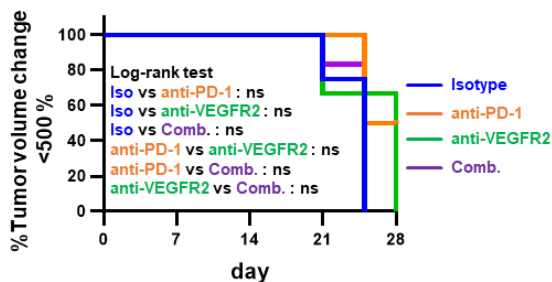

Exp #2

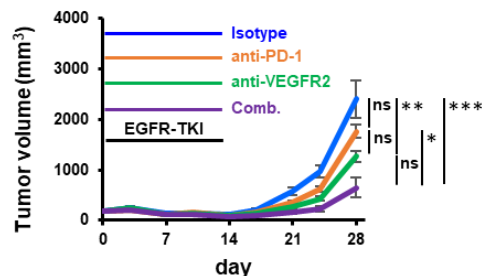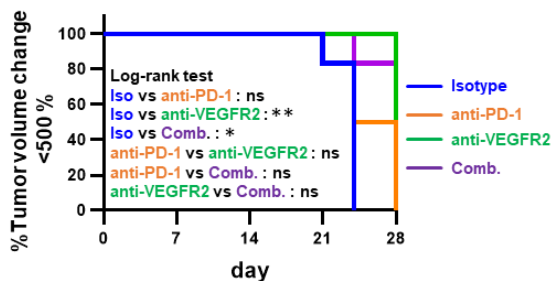

Exp #3

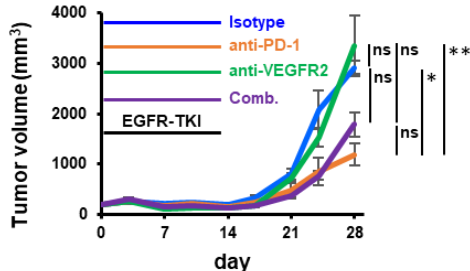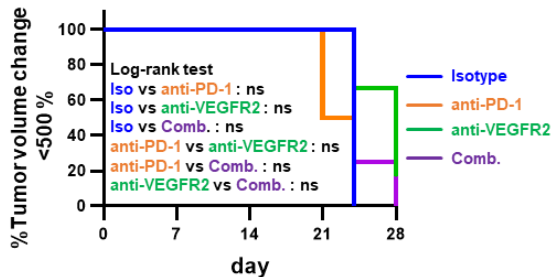

Suppl. Fig. S7

A

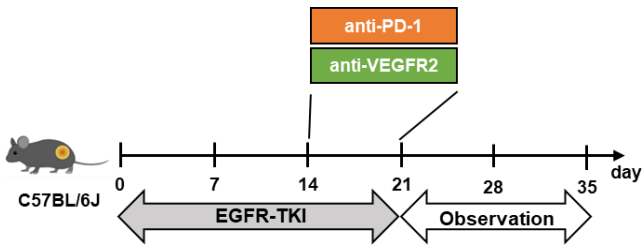

B

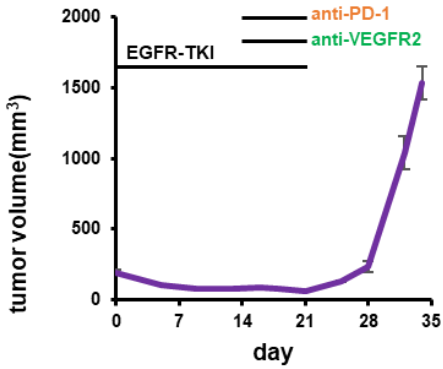

C

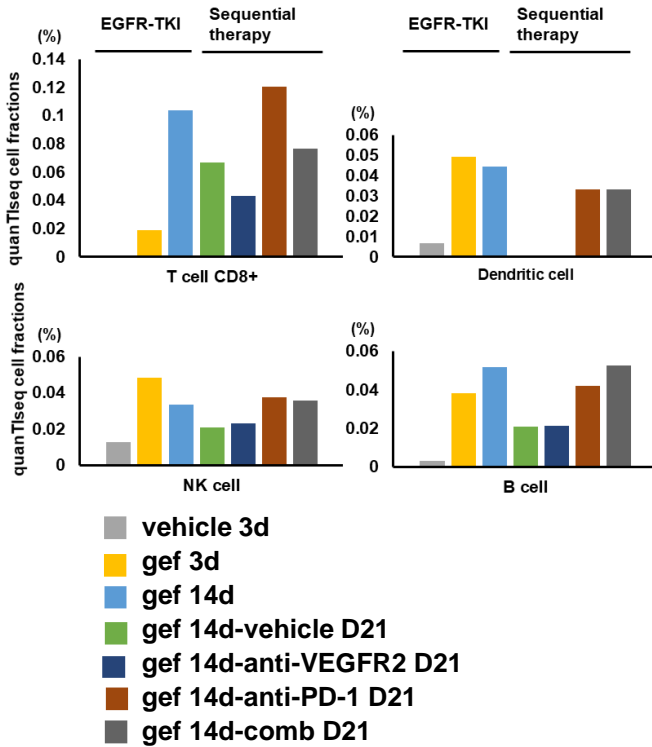



1 **Suppl. Fig. S1.**

2 **A.** NanoString analysis on lungs from wild-type mice (n=4) and genetically engineered  
3 mice bearing tumors with the *Egfr* exon 19 deletion (n=4) were assessed. Relative gene  
4 expression of 750 genes related to cancer immunity between the lungs from wild-type  
5 mice and those from the genetically engineered mice harboring *Egfr* exon 19 deletion. **B.**

6 Cluster analysis of the expression profiles of 750 genes related to cancer immunity  
7 between the lungs from wild-type mice (n=4 lungs. 4 mice per group) and genetically  
8 engineered mice harboring *Egfr* exon 19 deletion (n=4 lungs. 4 mice per group).

9 **C.** Tumor growth in the syngeneic *Egfr*-mutant lung cancer model treated with gefitinib  
10 of indicated dosage for 14 days and subsequently observed for 7 days. Gefitinib (5, 10,  
11 15 or 50 mg/kg, p.o., 5 days/week). n=4 tumors per group. 2 mice per group. Bars,  
12 mean±standard error.

13 **D.** IHC analysis of CD8 and Foxp3 expression in the spleen tissue as a positive control  
14 from mice treated with saline with 0.5% polyoxyethylene sorbitan monooleate for 3 days.  
15 Magnification: ×200 or ×800. Bars: 100 μm.

16 **E.** FCM analysis of CD8<sup>+</sup> T cells (CD3<sup>+</sup>CD8<sup>+</sup>) and Tregs (CD4<sup>+</sup>/CD25<sup>+</sup>/FOXP3<sup>+</sup>) within  
17 the dissociated *Egfr*-mutant lung tumor cells from mice treated with saline with 0.5%  
18 polyoxyethylene sorbitan monooleate for 3 days and representative gating setting data.

19

20 **Suppl. Fig. S2.**

21 **A. B.** FCM analysis of MHC class I proteins H-2Kb and H-2Db within the dissociated

22 *Egfr*-mutant tumor cells from mice treated with saline with 0.5% polyoxyethylene

23 sorbitan monooleate as vehicle for 3 days or EGFR-TKI, gefitinib (50mg/kg, p.o.) and

24 representative FCM data. n=5-6 tumors per group. 3 mice per group. **C.** Left: A

25 representative image of CD8 staining in the *Egfr*-mutated lung cancer treated with the

26 indicated therapy for 7 days. EGFR-TKI: gefitinib (50 mg/kg, p.o., 7 days/week),

27 FTY720 (300 µg/kg/day, p.o., 7 days/week), Magnification: ×200 or ×800. Bars: 100 µm.

28 Right: CD8-positive area are quantified using ImageJ software. (n=20 field-of-view per

29 group, Magnification: ×200)

30 **D.** Tumor growth in the syngeneic *Egfr*-mutated lung cancer model treated with saline

31 with 0.5% polyoxyethylene sorbitan monooleate as vehicle or FTY720 (300 µg/kg/day,

32 p.o., 7 days/week) for 12 days (n=6 tumors per group. 3 mice per group).

33 **E.** Tumor growth in the syngeneic *Egfr*-mutated lung cancer model treated with gefitinib

34 (50 mg/kg, p.o., 7 days/week) for 14 days and saline with 0.5% polyoxyethylene sorbitan

35 monooleate as vehicle or FTY720 (300 µg/kg/day, p.o., 7 days/week) for 18 days (n=8

36 tumors per group. 4 mice per group.).

37 Bars, mean±standard error. ns, not significant. \*p<0.05, \*\*\*\*p<0.0001, t-test.

38

39 **Suppl. Fig. S3.**

40 Tumor growth in the syngeneic graft tumor derived from MC-38 cells treated with anti-

41 PD-1 for 24 days. Isotype antibody group (n=5 tumors per group. 5 mice per group), anti-

42 PD-1 group (10 mg/kg/day, i.p., every 5 days) (n=5 tumors per group. 5 mice per group).

43 Bars, mean±standard error. \*\*\*p<0.001, t-test.

44

45 **Suppl. Fig. S4.**

46 **A.** A representative image of VEGFR2 and FasL staining in the *Egfr*-mutant lung tumors

47 treated with the indicted therapy. EGFR-TKI: gefitinib (50 mg/kg, p.o., 7 days/week),

48 Magnification: ×200 or ×800. Bars: 100 μm.

49 **B.** Tumor volume change rate in the *Egfr*-mutant lung cancer model treated with gefitinib

50 (50 mg/kg, p.o., 5 days/week) and/or anti-VEGFR2 (10 mg/kg/day, i.p., every 3 days) for

51 14 days and subsequently observed for 14 days, n=6 tumors per group. 3 mice per group.

52 Bars, mean±standard error.

53

54 **Suppl. Fig. S5.**

55 A, B, C. RNA expression in the tumors treated with vehicle as saline with 0.5%  
56 polyoxyethylene sorbitan monooleate for 3 days or indicated drug at 3, 14 and 21 days.  
57 Comb., combination anti-PD-1/anti-VEGFR2; gef, gefitinib (50 mg/kg 7 days/week); d,  
58 days; gef14d-vehicle D21, gefitinib for 14 days followed by isotype antibody for 7 days;  
59 gef14d-anti-VEGFR2 D21, gefitinib for 14 days followed by anti-VEGFR2 (10  
60 mg/kg/day, i.p., every 3 days) for 7 days; gef14d-anti-PD-1 D21, gefitinib for 14 days  
61 followed by anti-PD-1 (10 mg/kg/day, i.p., per 5 days) for 7 days; gef14d-comb D21,  
62 gefitinib for 14 days followed by combination anti-PD-1/anti-VEGFR2 for 7 days.

63

64 **Suppl. Fig. S6.**

65 **A.** Left: A representative image of CD206 staining in the *Egfr*-mutant lung cancer treated  
66 with gefitinib (50 mg/kg, p.o., 7 days/week) for 3 or 14 days. Magnification:  $\times 200$  or  
67  $\times 800$ . Bars: 100  $\mu\text{m}$ . Right: The CD206-positive area is quantified using ImageJ software.  
68 Bars, mean $\pm$ standard error. (n=5 field-of-view per group, Magnification:  $\times 200$ ).  
69 \*\*\*\*p<0.0001, t-test.

70 **B.** A representative image of CD8 and CD206 staining in the *Egfr*-mutated lung cancer  
71 treated with afatinib (15mg/kg, p.o., 7 days/week) for 4 or 14 days. Magnification:  $\times 200$   
72 or  $\times 800$ . Bar: 100  $\mu\text{m}$ .

73 C. A representative image of CD206 staining in the *Egfr*-mutated lung cancer treated with  
74 EGFR-TKI (gefitinib, 50 mg/kg, p.o., 7 days/week) for 14 days, followed by the indicated  
75 treatment with vehicle, anti-PD-1, anti-VEGFR2, or combination anti-PD-1/anti-  
76 VEGFR2 for 7 days. Isotype control as vehicle (n=6 tumors per group. 3 mice per  
77 group), anti-VEGFR2 (10 mg/kg/day, i.p., every 3 days; n=6 tumors per group. 3 mice  
78 per group), anti-PD-1 (10 mg/kg/day, i.p. every 5 days; n=6 tumors per group. 3 mice per  
79 group), combination anti-PD-1/anti-VEGFR2 (n=6 tumors per group. 3 mice per group).  
80 Magnification:  $\times 200$  or  $\times 800$ . Bars: 100  $\mu\text{m}$ .

81 D. CD206-positive area is quantified using ImageJ software. (n=5 field-of-view per group,  
82 Magnification:  $\times 200$ ) Bars, mean $\pm$ standard error. ns, not significant. \*p<0.05, \*\*p<0.01,  
83 \*\*\*p<0.001, \*\*\*\*p<0.0001, one-way ANOVA with post-hoc Tukey's test.

84 Comb., combination anti-PD-1/anti-VEGFR2; gef, gefitinib (50 mg/kg, p.o., 7  
85 days/week); d, days; gef14d-vehicle D21, gefitinib for 14 days followed by isotype  
86 antibody for 7 days; gef14d-anti-VEGFR2 D21, gefitinib for 14 days followed by anti-  
87 VEGFR2 (10 mg/kg/day, i.p., every 3 days) for 7 days; gef14d-anti-PD-1 D21, gefitinib  
88 for 14 days followed by anti-PD-1 (10 mg/kg/day, i.p., per 5 days) for 7 days; gef14d-  
89 comb D21, gefitinib for 14 days followed by combination anti-PD-1/anti-VEGFR2 for 7  
90 days.

91

92 **Suppl. Fig. S7.**

93 **A.** FCM analysis of CD107a on CD8<sup>+</sup> T cells within the dissociated *Egfr*-mutated lung  
94 tumor from mice treated with gefitinib (50 mg/kg, p.o., 7 days/week). n=5-6 tumors per  
95 group. 3 mice per group. Bars, mean±standard error. \*\*p<0.01, \*\*\*p<0.001, one-way  
96 ANOVA with post-hoc Tukey's test.

97 **B.** The mice are treated with gefitinib group (50 mg/kg, p.o., 7 days/week) for 14 days  
98 followed by the indicated therapy for 7 days and subsequently observed for 14 days.  
99 Isotype control, anti-VEGFR2 (10 mg/kg/day, i.p., every 3 days), anti-PD-1 (10  
100 mg/kg/day, i.p. every 5 days), combination anti-PD-1 (10 mg/kg/day, i.p. every 5  
101 days)/anti-VEGFR2 (10 mg/kg/day, i.p., every 3 days). Body weight loss is not observed  
102 in the mice. n=6 tumors per group. 3 mice per group. Bars, mean±standard error. ns, not  
103 significant. one-way ANOVA with post-hoc Tukey's test.

104 **C.** Schematic image of the treatment schedule.

105 **D.** Left: Tumors in the *Egfr* -mutant lung cancer model were treated with the indicated  
106 therapy for 14 days and subsequently observed for 14 days. The gefitinib with isotype  
107 antibody, gefitinib with anti-VEGFR2 (10 mg/kg/day, i.p., every 3 days), gefitinib with  
108 anti-PD-1 (10 mg/kg/day, i.p., every 5 days), and gefitinib with the combination anti-PD-

109 1/anti-VEGFR2. Gefitinib (50 mg/kg, p.o., 5 days/week). n =6 tumors per group. 3 mice  
110 per group. one-way ANOVA with post-hoc Tukey's test. Right: The survival probability  
111 is calculated using the Kaplan–Meier method, and differences in survival are evaluated  
112 using the Log-rank test with Bonferroni correction. Kaplan–Meier plot showing  
113 percentage of animals with tumor burden below 500% compared to those at Day 14 for  
114 the duration of this study. n =6 tumors per group. 3 mice per group. Bars, mean±standard  
115 error. ns, not significant. \*p<0.05, \*\*p<0.01, \*\*\*p<0.001.

116 Comb., combination anti-PD-1/anti-VEGFR2

117

118 **Suppl. Fig. S8.**

119 **A.** Schematic image of the treatment schedule.

120 **B.** Tumors in the *Egfr*-mutated lung cancer model are treated with the gefitinib for 14

121 days and subsequently treated with gefitinib, anti-PD-1 and anti-VEGFR2 for 7 days (n=6).

122 Gefitinib (50 mg/kg, p.o., 7 days/week), anti-VEGFR2 (10 mg/kg/day, i.p., every 3 days),

123 anti-PD-1 (10 mg/kg/day, i.p., every 5 days). n=6 tumors per group. 3 mice per group.

124 Bars, mean±standard error.

125 **C.** quanTIseq analysis to estimate the fraction of immune cells in the *Egfr*-mutated lung

126 tumor from mice treated with the indicated therapy. vehicle 3d, saline with 0.5%

127 polyoxyethylene sorbitan monooleate for 3 days, gef, gefitinib (50 mg/kg 7 days a week);  
128 d, days; gef14d-vehicle D21, gefitinib for 14 days followed by isotype antibody for 7  
129 days; gef14d-anti-VEGFR2 D21, gefitinib for 14 days followed by anti-VEGFR2 (10  
130 mg/kg/day, i.p., every 3 days) for 7 days; gef14d-anti-PD-1 D21, gefitinib for 14 days  
131 followed by anti-PD- (10 mg/kg/day, i.p., per 5 days) for 7 days; gef14d-comb D21,  
132 gefitinib for 14 days followed by a combination anti-PD-1/anti-VEGFR2 for 7 days.
